# Supplementary material for: Bio-degradable electrospun nanofibers encompassing dioxidovanadium benzimidazole compounds as potential drug delivery systems for diabetes mellitus
Source: Royal Society of Chemistry journal article supplement (doi:10.1039/d6ra01655c), 2026-06-09
Supplement: d6ra01655c1.pdf [file d6ra01655c1.pdf]

Electronic Supplementary Material (ESI) for New Journal of Chemistry.

This journal is © The Royal Society of Chemistry and the Centre National de la Recherche Scientifique 2024

## Bio-degradable electrospun nanofibers encompassing dioxidovanadium benzimidazole compounds as potential drug delivery systems for diabetes mellitus

Sanam Maikoo\*,<sup>a</sup> Mongezi Mahjebe,<sup>a</sup> Andile Khathi,<sup>b</sup> Allen Mambanda,<sup>a</sup> Bongeka Mshengu,<sup>b</sup> Lindokuhle Patience Mabuza,<sup>b</sup> Phikelelani Ngubane,<sup>b</sup> Irvin Noel Booysen\*<sup>a</sup>

<sup>a</sup> School of Agriculture and Science, University of KwaZulu-Natal, Pietermaritzburg, 3201, South Africa. E-mail: [smaikoo7@gmail.com](mailto:smaikoo7@gmail.com) (SM); [booysemi@ukzn.ac.za](mailto:booysemi@ukzn.ac.za) (IB)

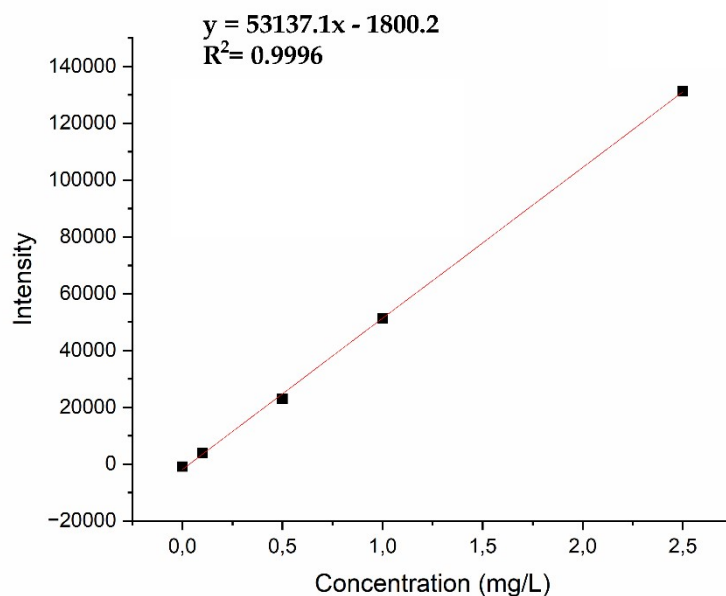

**Fig.S1** The ICP calibration curve for various standardized ruthenium samples at 311 nm.

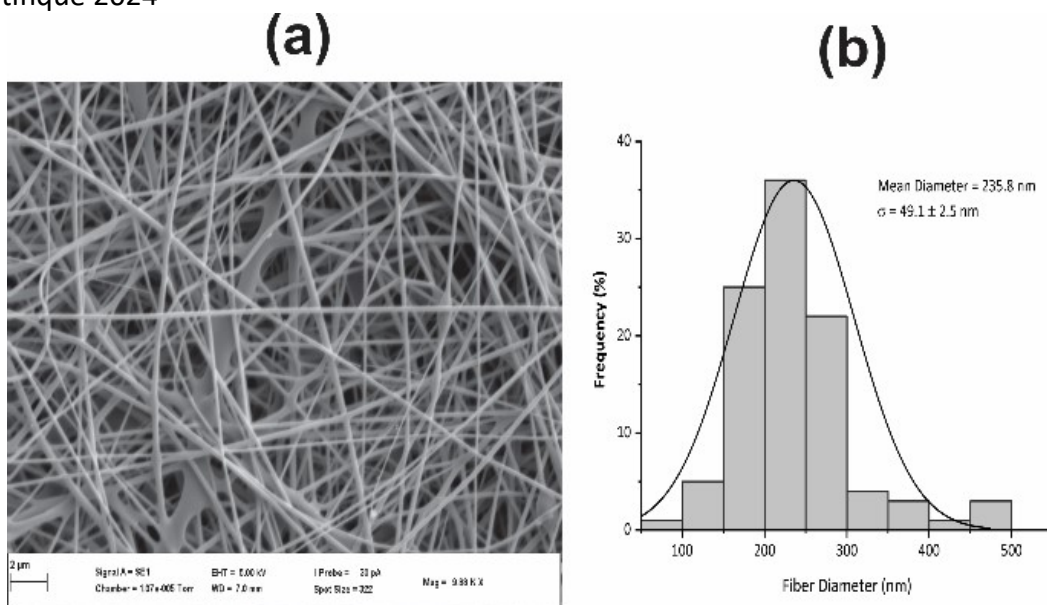

**Fig. S2** (a) SEM image of unmodified PVA|CS-ENFs and their (b) fiber diameter distribution histogram.

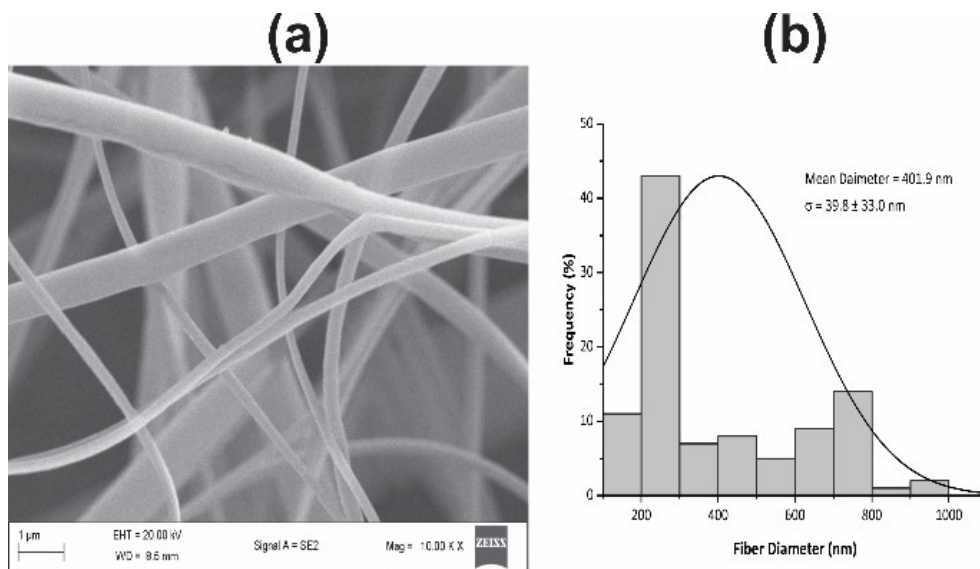

**Fig. S3** (a) SEM image of PVA|CS-1-(SB)-ENFs and their (b) fiber diameter distribution histogram.

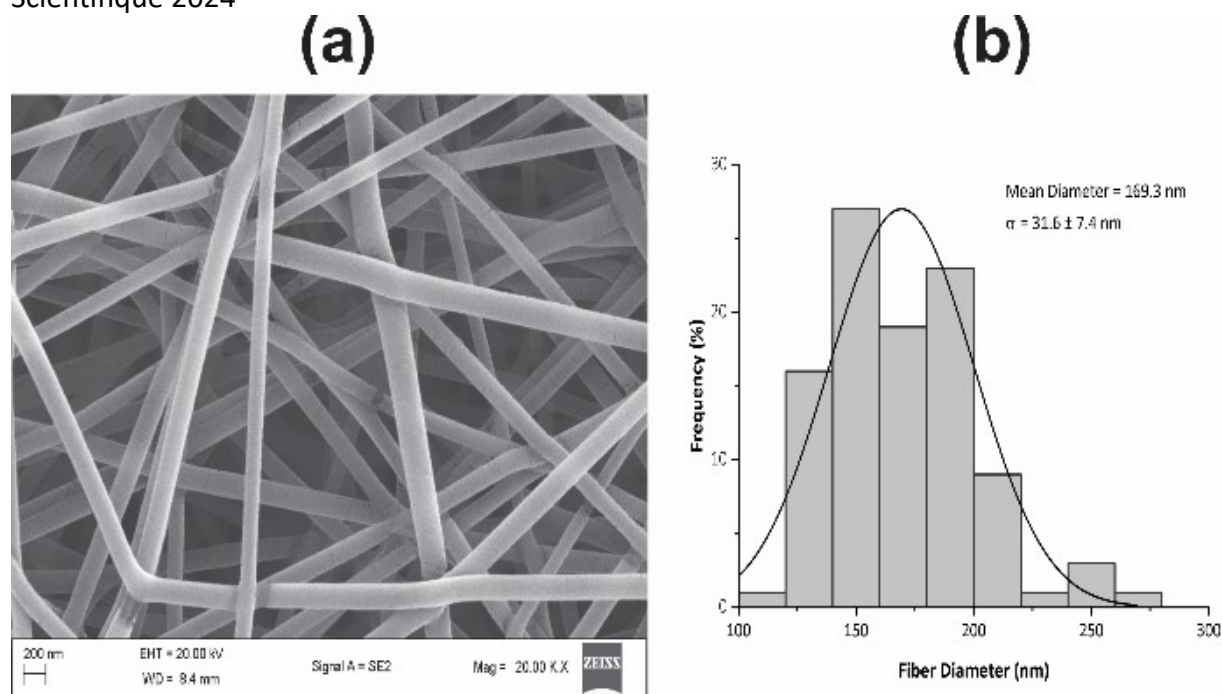

**Fig. S4** (a) SEM image of 2 PVA|CS-2-(DB)-ENFs and their (b) fiber diameter distribution histogram.

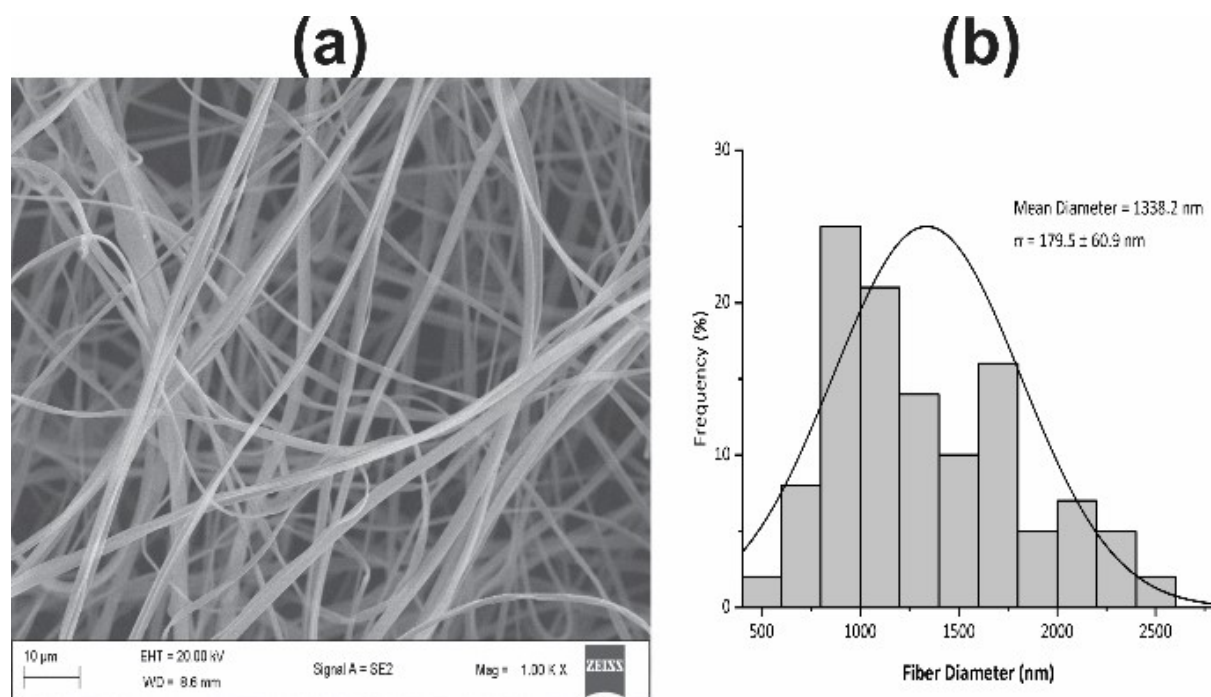

**Fig. S5** (a) SEM image of PVA|CS-2-(SB)-ENFs and their (b) fiber diameter distribution histogram.

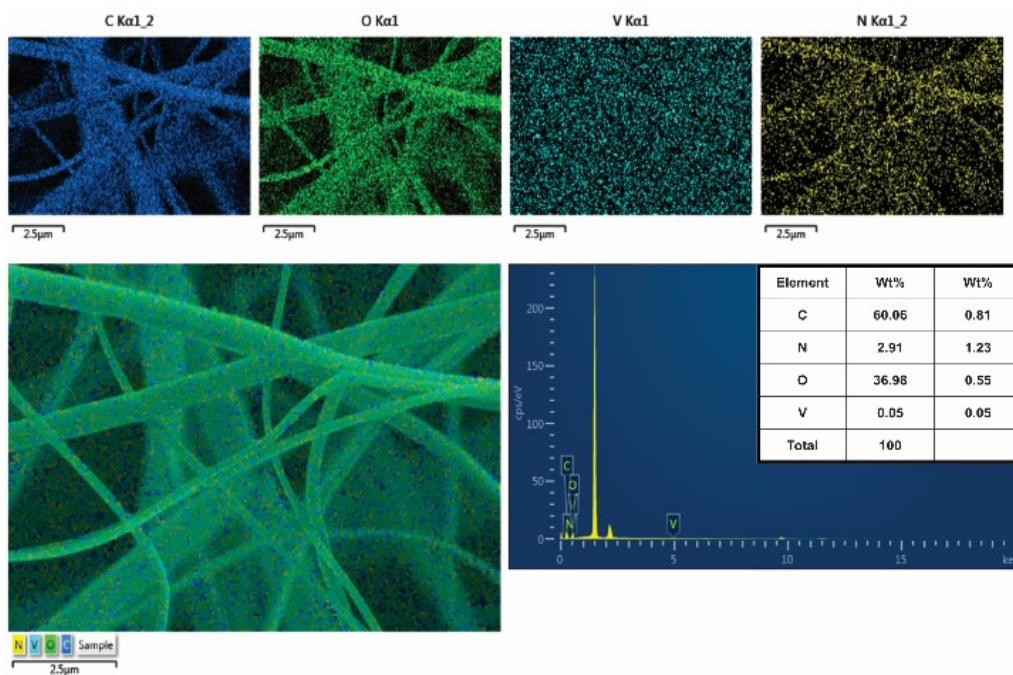

**Fig. S6** Elemental mapping of PVA|CS-1-(SB)-ENFs.

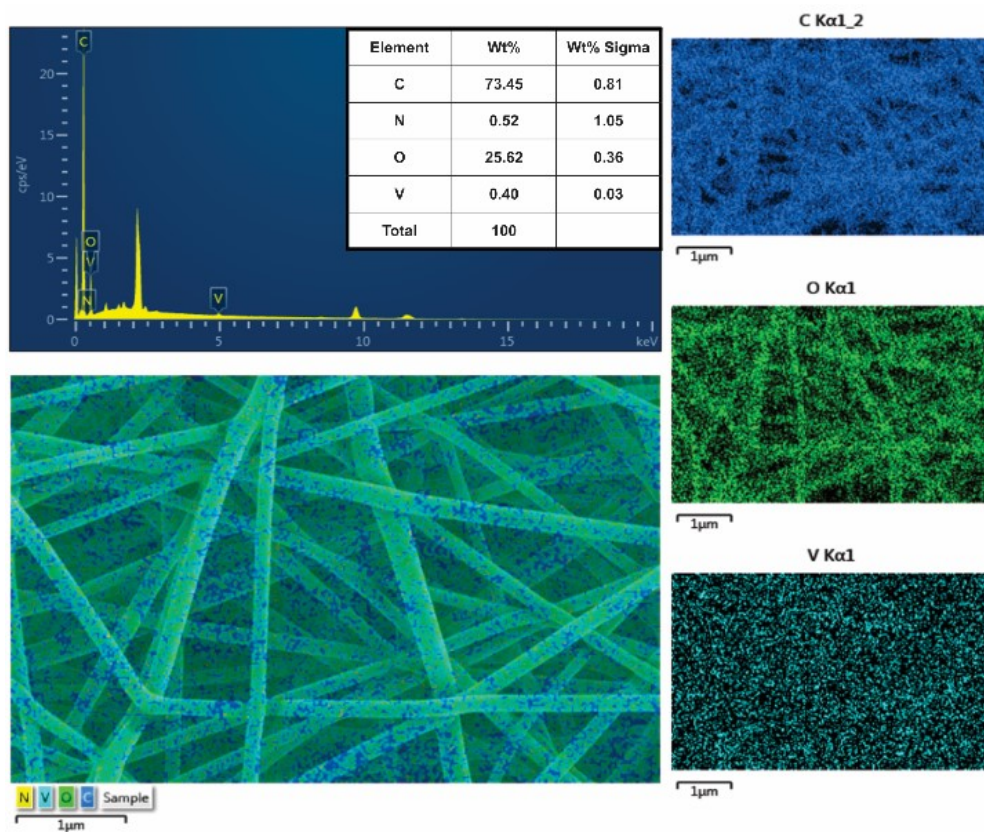

**Fig. S7** Elemental mapping of PVA|CS-2-(DB)-ENFs.

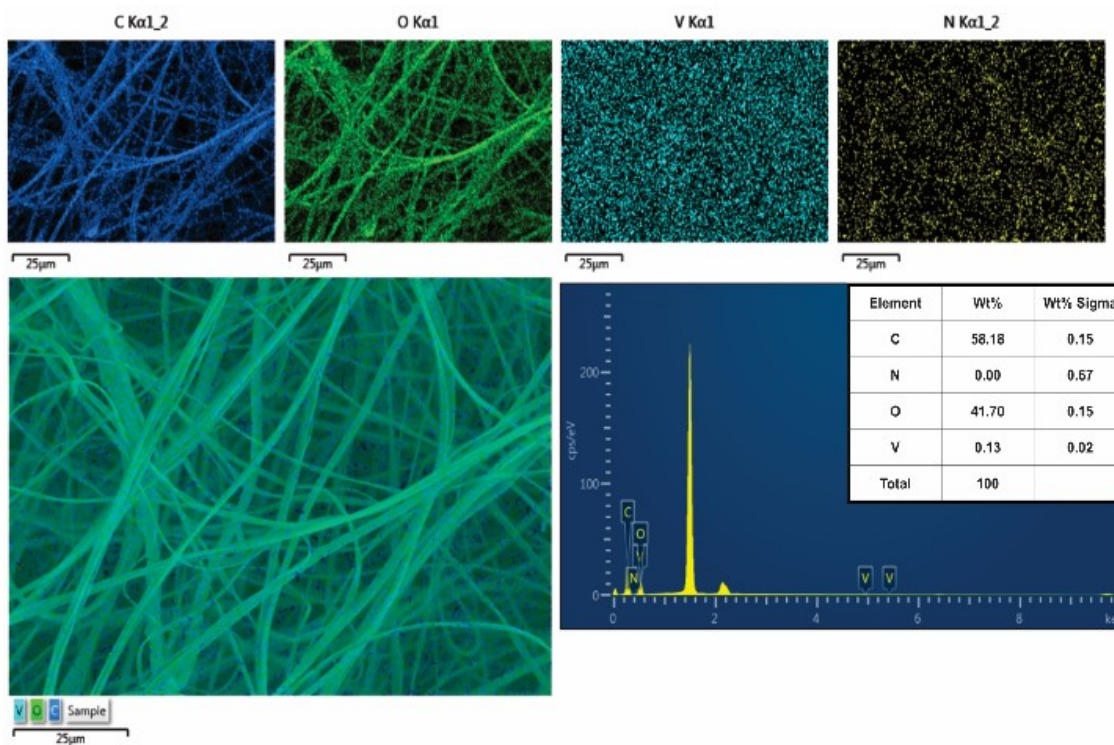

**Fig. S8** Elemental mapping of PVA|CS-2-(SB)-ENFs

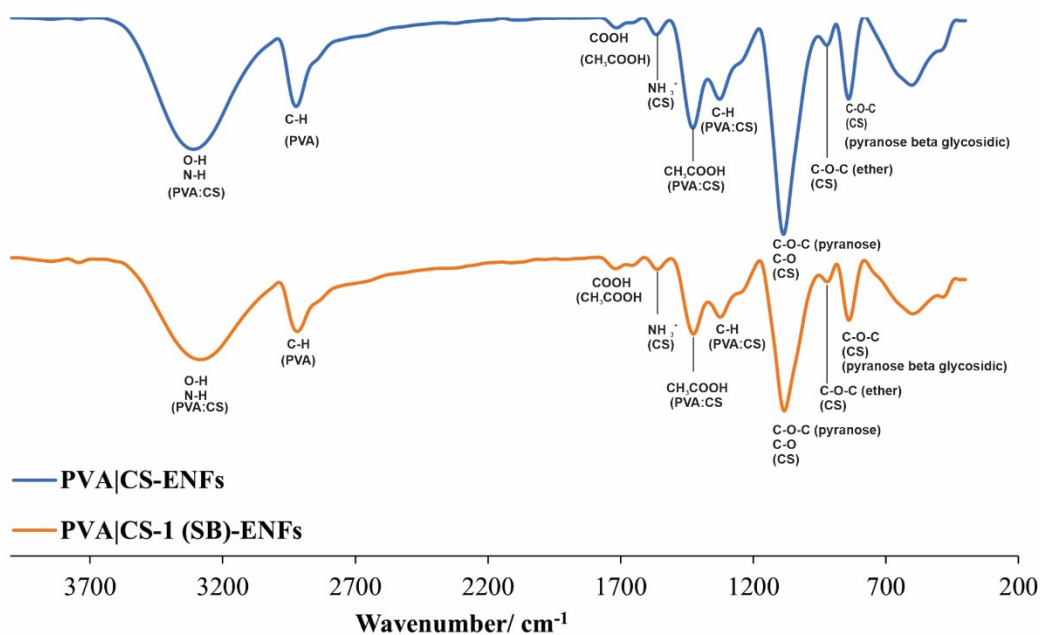

**Fig. S9** Stacked FTIR spectra of PVA|CS ENFs and PVA|CS-1 (SB) ENFs.

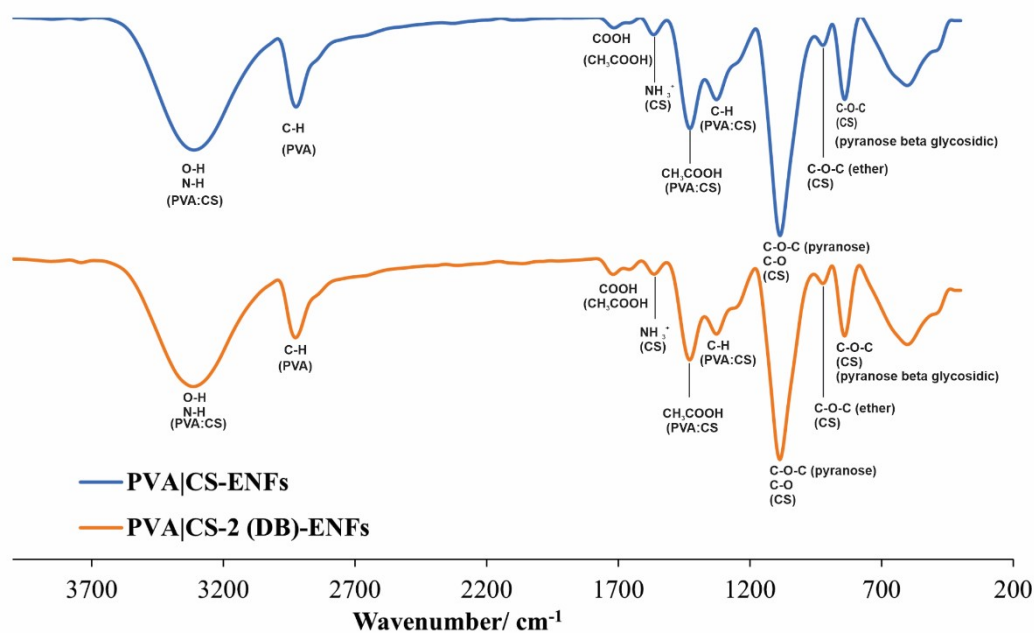

**Fig.S10** Stacked FTIR spectra of PVA|CS-ENFs and PVA|CS-2-(DB)-ENFs.

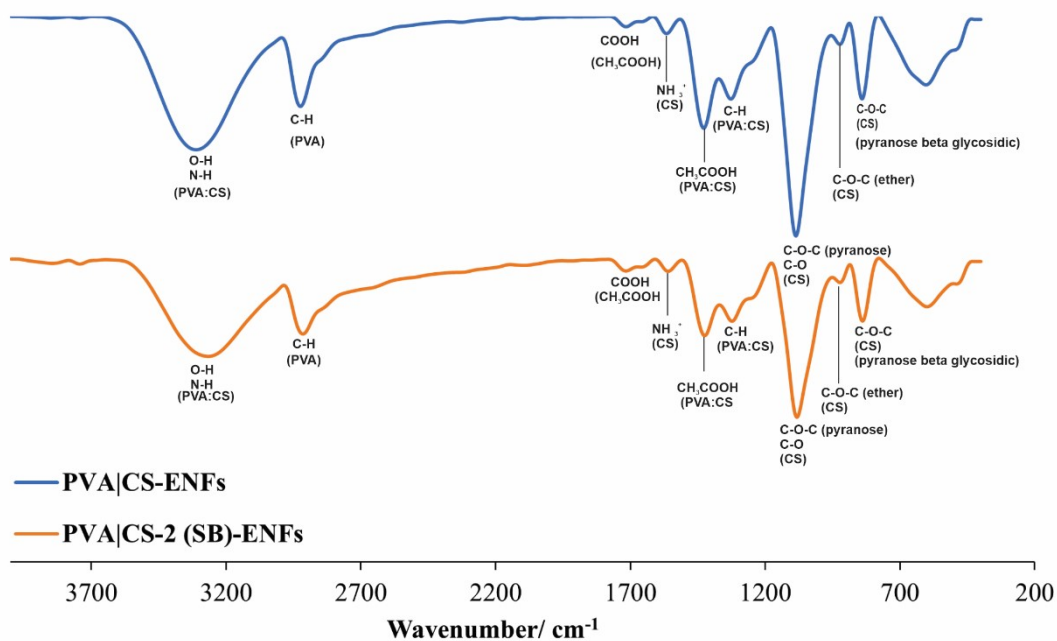

**Fig.S11** Stacked FTIR spectra of PVA|CS-ENFs and PVA|CS-2-(SB)-ENFs.

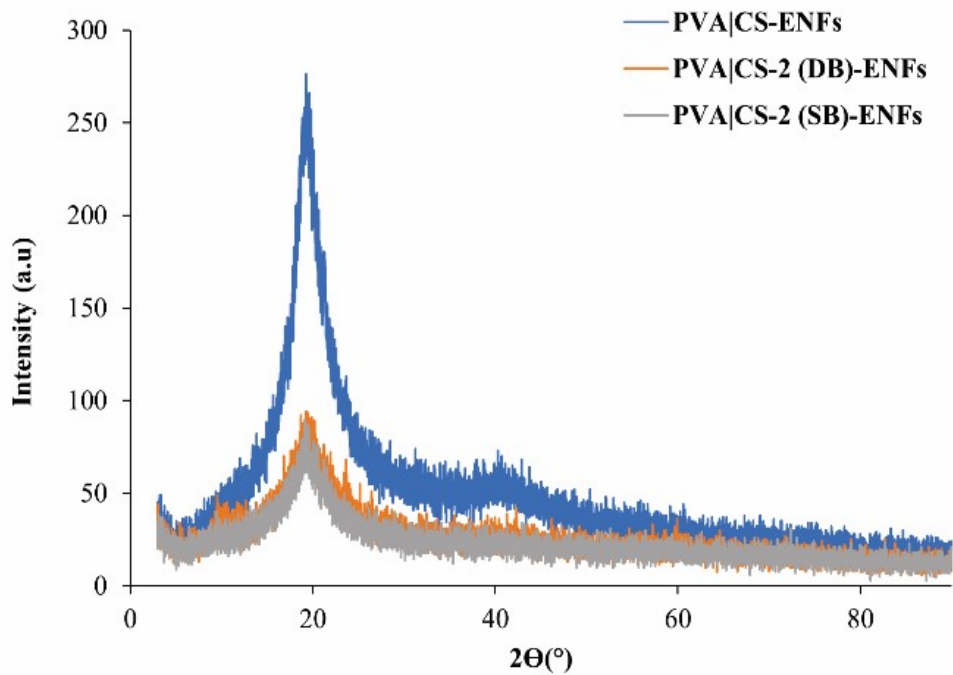

Fig.S12 Overlay powder XRD patterns of PVA|CS-ENFs and PVA|CS-2-(DB)-ENFs.

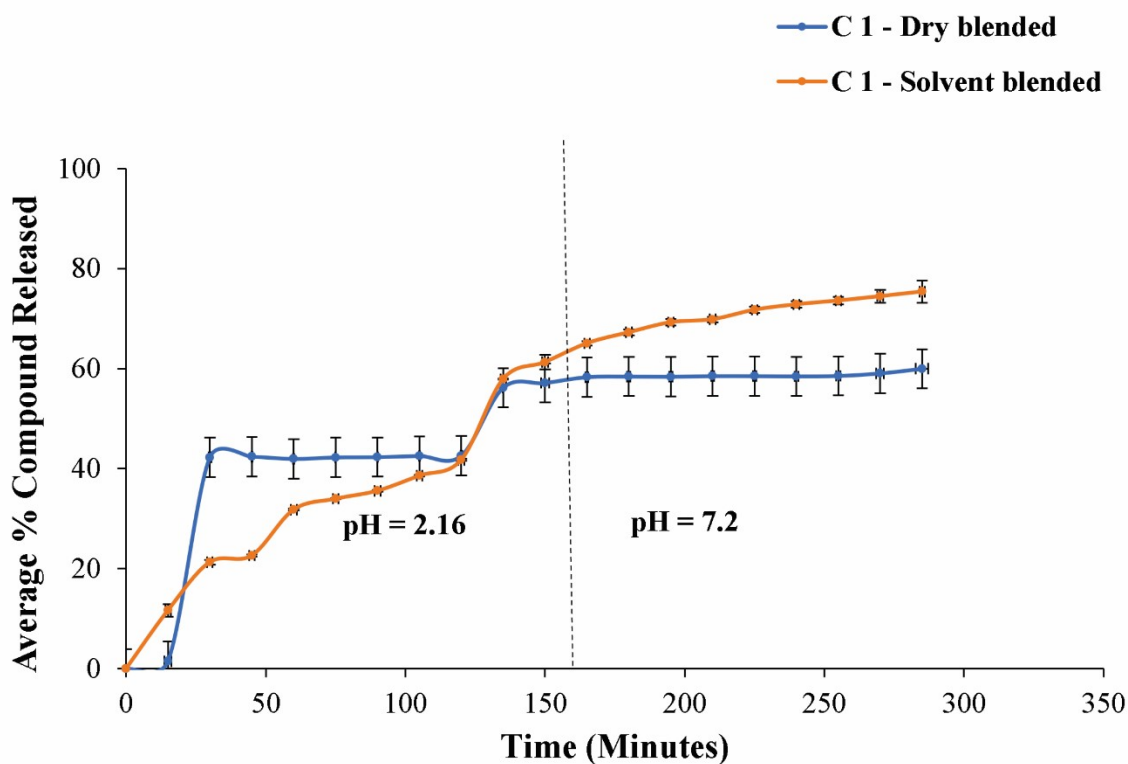

Fig. S13 Release profile of the complex-loaded ENFs of **1**, using the pH change method (%RSD <5%; n=2).

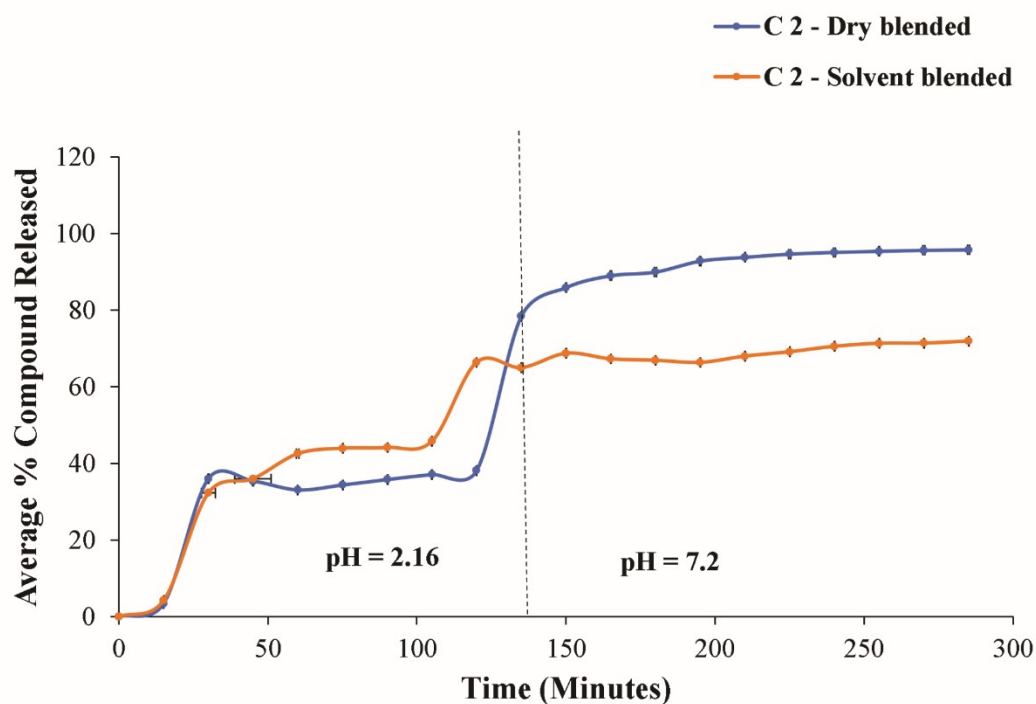

**Fig.S14** *In-vitro* release profile of PVA|CS-2-ENFs (by the DB and SB methods at a pH of 2.16 (for the first 2 h) and at 7.2 (for the subsequent 3 h) [%RSD <5%; n=2].

**Table S1** ICP-OES vanadium trace concentrations (mg/L) across samples at different time intervals, collected at 309.310 nm.

| Sample        | Physiological Medium | 1 hr  | 2 hrs | 4 hrs | 24 hrs | 48 hrs |
|---------------|----------------------|-------|-------|-------|--------|--------|
| 1             | 0.174                | 0.164 | 0.161 | 0.166 | 0.253  | 0.249  |
| 2             | 0.212                | 0.164 | 0.161 | 0.253 | 0.252  | 0.250  |
| PVA CS-1 (DB) | 0.008                | 0.165 | 0.158 | 0.251 | 0.251  | 0.250  |
| PVA CS-1 (SB) | 0.163                | 0.169 | 0.158 | 0.254 | 0.253  | 0.249  |
| PVA CS-2 (DB) | 0.162                | 0.158 | 0.157 | 0.253 | 0.250  | 0.247  |
| PVA CS-2 (SB) | 0.164                | 0.160 | 0.163 | 0.253 | 0.251  | 0.249  |

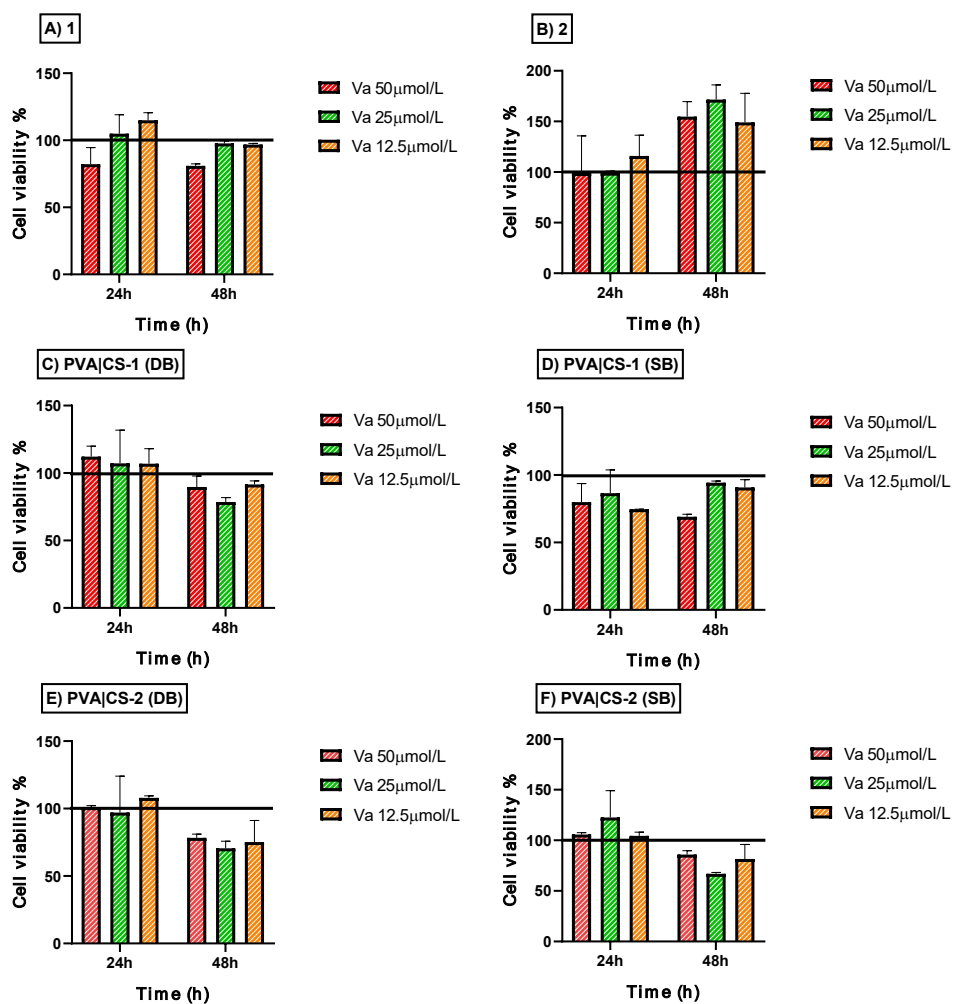

**Fig.S15** The effects of vanadium heterocyclic compound-loaded ENFs on the cell viability of HepG2 liver cells over the treatment period of 24 and 48 hours.  $\sigma < 0.05$  in comparison to the control group (Va: concentration of complex or complex-loaded ENF).

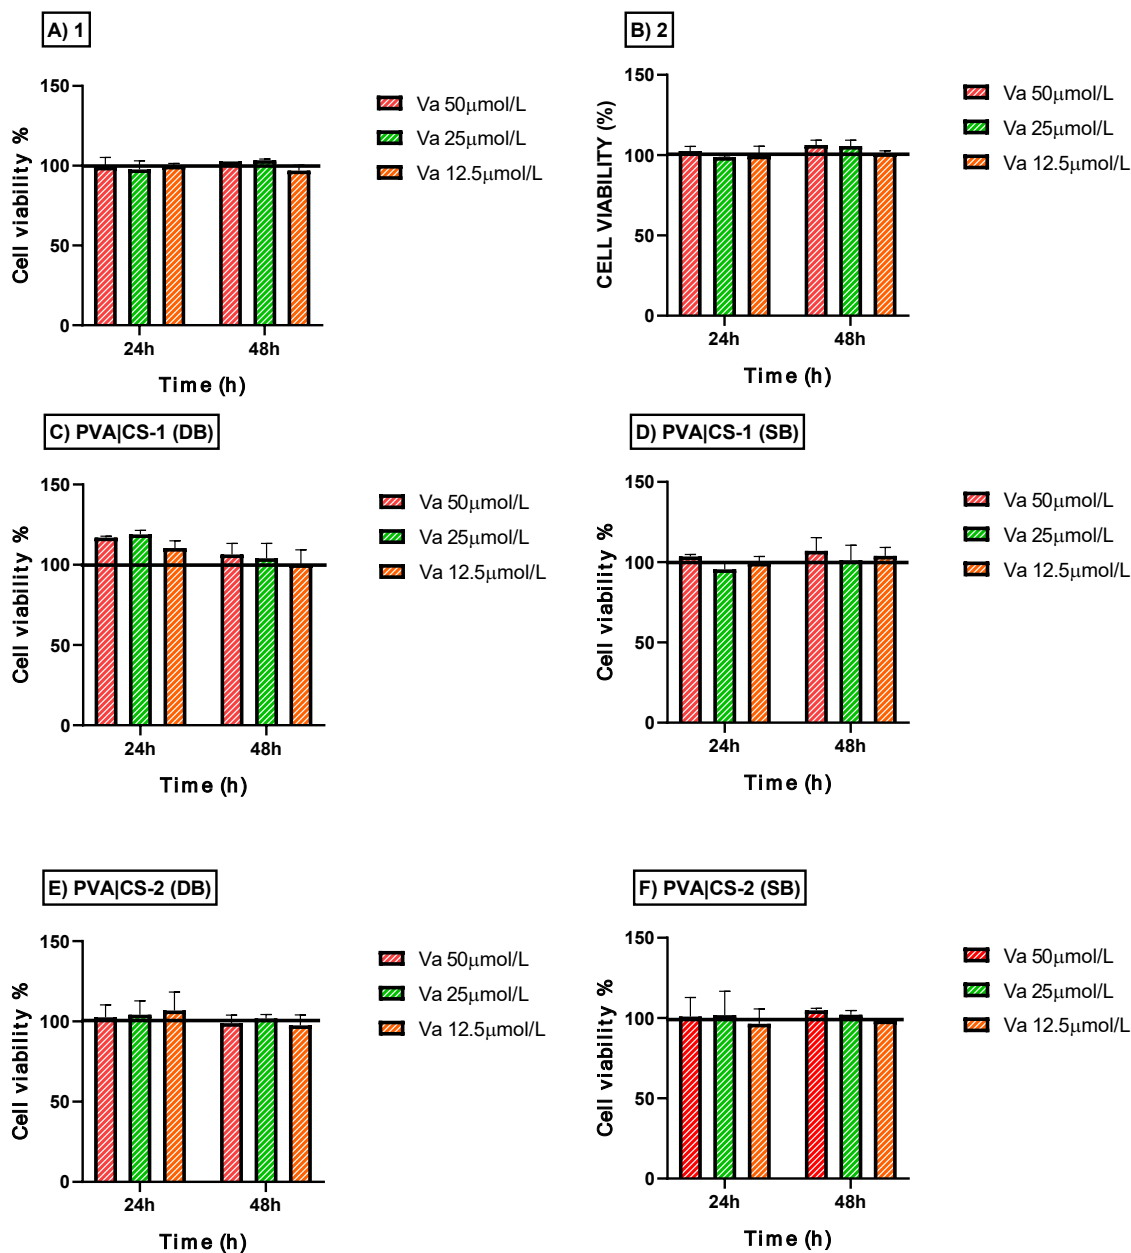

**Fig.S16** The effects of vanadium heterocyclic compound-loaded ENFs on the cell viability of C2C12 skeletal muscle cells over the treatment period of 24 and 48 hours.  $\sigma < 0.05$  in comparison to the control group (Va: concentration of complex or complex-loaded ENF).
